# Supplementary material for: Probiotic-guided CAR-T cells for universal solid tumor targeting
Source: bioRxiv or medRxiv preprint supplement (doi:10.1101/2021.10.10.463366), 2021-10-11
Supplement: Supplementary file [file media-1.pdf]

## SUPPLEMENTARY MATERIALS

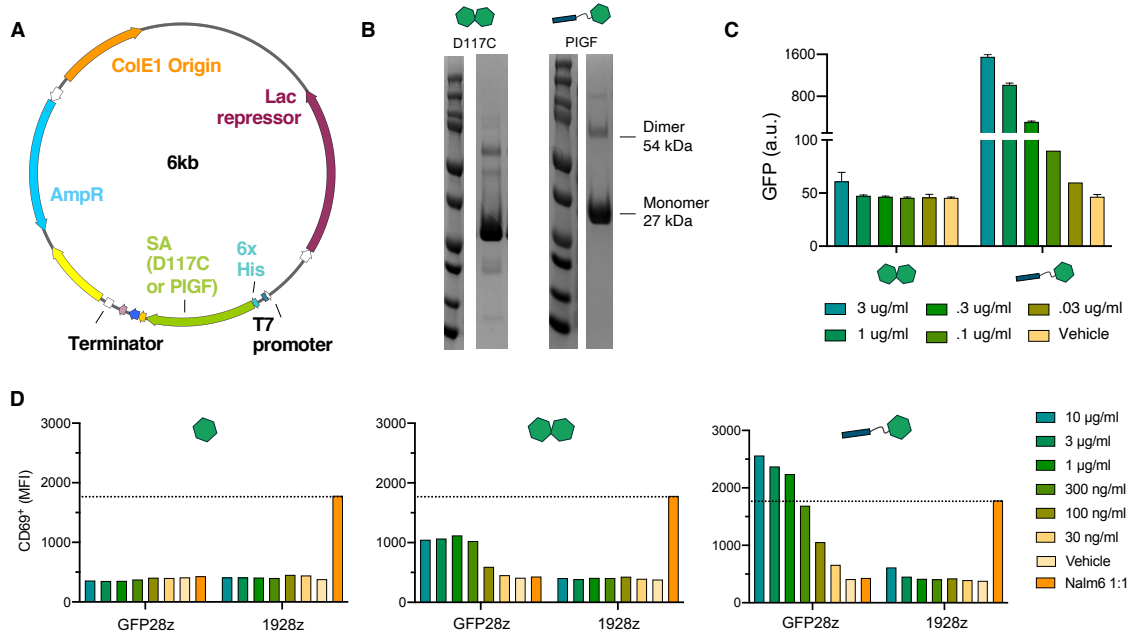

**Supplementary Figure 1. Recombinantly produced, His-tag purified PIGF binds to collagen coated plates and strongly activates GFP-CAR<sup>+</sup> Jurkats.** (A) Plasmid map of protein expression vector transformed into eNiCo21(DE3) *E. coli* cells for protein purification of D117C and PIGF sfGFP variants. (B) Elutions of His-tag purified sfGFP variants, sizes show monomeric and dimeric molecules. (C) D117C and PIGF variants were plated in half log dilutions in PBS on collagen coated plates, incubated for 30 m at 37°C and washed 2X with PBS to dislodge any unbound protein. Fluorescence intensity was read at 488 nm on a standard Tecan plate reader. (D) CD69 expression on GFP CAR<sup>+</sup> or CD19 CAR<sup>+</sup> Jurkat cells. Jurkats were plated on collagen coated plates and assessed for CD69 expression by flow cytometry following 16-hour incubation with purified GFP antigens or co-culture with CD19<sup>+</sup> target cells (Nalm6). Error bars represent s.d. of biological replicates.

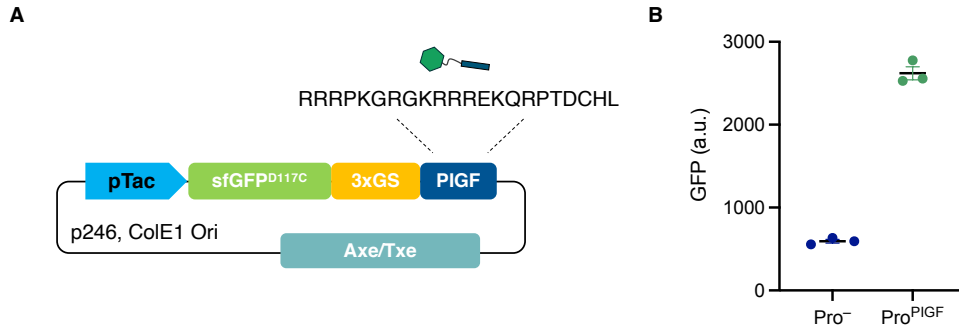

**Supplementary Figure 2. Therapeutic *E. coli* Nissle 1917 (EcN) produces sfGFP-PIGF SA.**

(A) PIGF SA variant is expressed from an Axe/Txe stabilized, high copy number plasmid under a constitutive *tac* promoter. (B) PIGF production by EcN (Pro<sup>PIGF</sup>) as measured by GFP-fluorescence on a Tecan plate-reader and shown relative to an empty EcN control (Pro<sup>-</sup>). Error bars represent s.d. of biological replicates. a.u. arbitrary units.

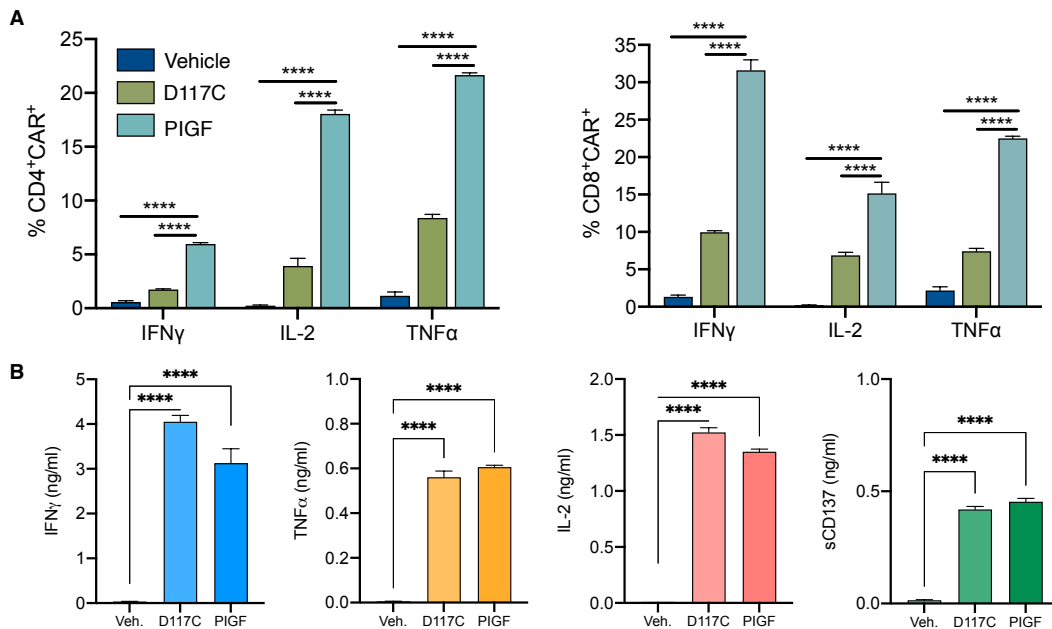

**Supplementary Figure 3. GFP-directed CAR-T cells activate in response to soluble and collagen-bound sfGFP. (A)** Quantification of flow cytometric analysis of intracellular staining for pro-inflammatory cytokines in response to 0.1 ng/ml soluble D117C, or collagen bound PIGF. **(B)** Quantification of cytokine production as measured in cell culture supernatants from GFP28z exposed to a PBS vehicle, D117C, or collagen-bound PIGF for 24hr. Error bars represent s.d. of biological replicates, \*\*\*\*  $p < 0.0001$  2way (A) or 1way (B) ANOVA, Holm-Sidak multiple comparison correction.

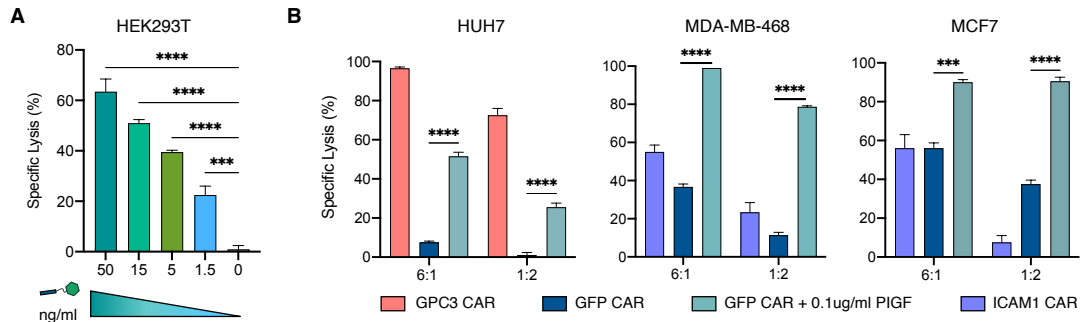

**Supplementary Figure 4. GFP-directed CAR-T cells mediate killing of target cells in response to collagen-bound sfGFP. (A)** Overnight killing assays against *fluc*<sup>+</sup> HEK293T at a fixed effector to target (E:T) ratio of 1:3 and half log dilutions of collagen-bound PIGF from 50-1.5 ng/ml. **(B)** Overnight killing assays against *fluc*<sup>+</sup> HUH7, MDA-MB-468, or MCF7 target cells at defined effector to target (E:T). CAR-T cells were co-cultured with target cells on collagen coated plates +/- 0.1 ug/ml sfGFP-PIGF for 20 hours before lysis and addition of luciferin. Luminescence (RLU) was detected with a Tecan plate reader within 20 minutes of lysis. Specific lysis (%) was determined by normalizing RLU to co-cultures with untransduced T cells. Error bars represent s.d. of biological replicates, \*\*\* p<0.001, \*\*\*\* p<0.0001 1way (A) or 2way ANOVA (B), Holm-Sidak multiple comparison correction.

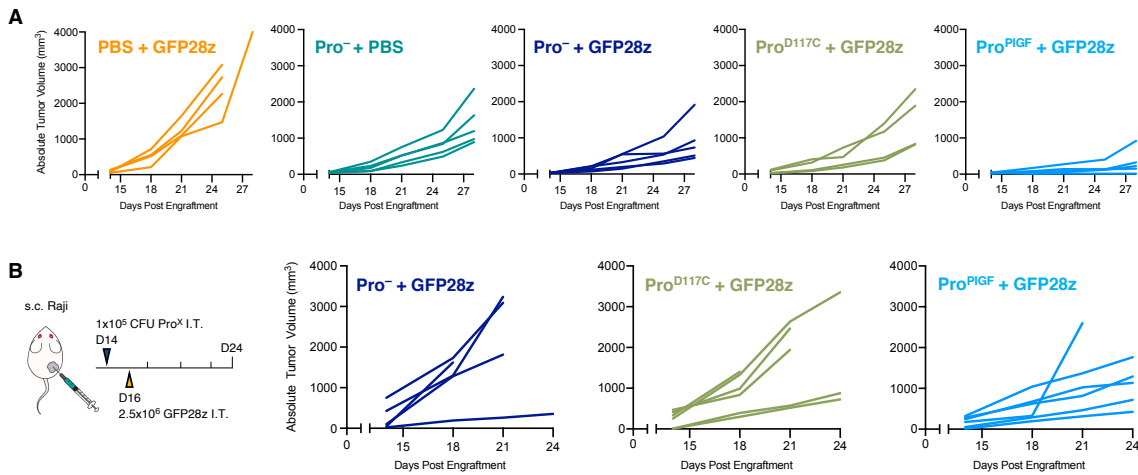

**Supplementary Figure 5. Individual growth trajectories of human tumors treated with the ProCAR system.** (A) Nalm6 tumors were established in NSG mice and treated as in Fig. 3A. Individual tumor trajectories are shown. (B) Raji lymphoma cells ( $5 \times 10^5$ ) were implanted subcutaneously into the hind flank of NSG mice. When tumor volumes reached  $\sim 100 \text{ mm}^3$ , mice were intratumorally (I.T.) injected with  $1 \times 10^5$  CFU of Pro<sup>-</sup>, Pro<sup>D117C</sup>, or Pro<sup>PIGF</sup> strains.  $2.5 \times 10^6$  GFP28z ProCAR-T cells were then I.T. delivered 48-hours post bacterial injection. Tumor growth was monitored by caliper measurements every 3-4 days, individual tumor trajectories are shown.

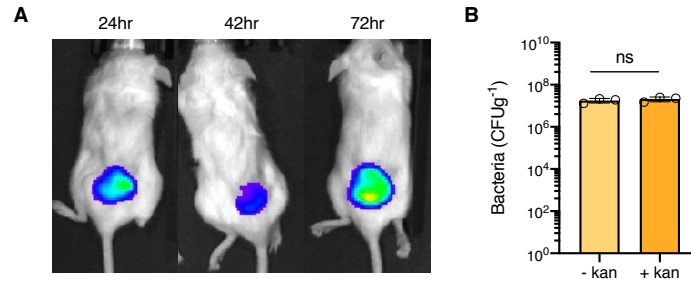

**Supplementary Figure 6. Probiotic EcN remains localized to tumors in immunocompromised NSG mice. (A)** IVIS images showing bioluminescent Pro<sup>-</sup> populations over time following intratumoral injection of Raji tumors subcutaneously established as in Fig. S5B. **(B)** At day 14 post treatment, Pro<sup>PIGF</sup>-treated tumors were homogenized and plated on LB agar plates containing the appropriate antibiotics (+/- kanamycin) for bacteria colony quantification. Error bars represent s.d. of biological replicates, student's t test; ns, not significant

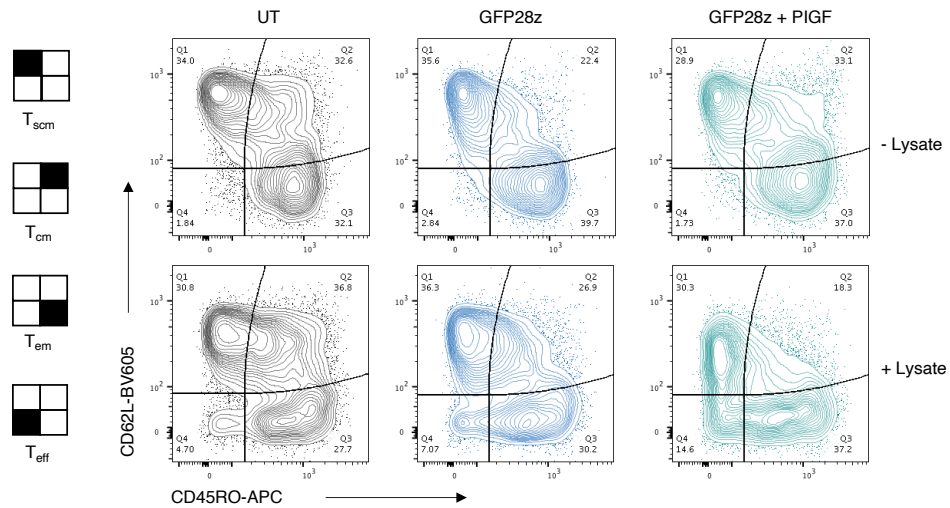

**Supplementary Figure 7. *E. Coli* Nissle (EcN) lysate drives T cell effector phenotype.**

Representative flow cytometry contour plots assessing the phenotype of T-cells following stimulation with either media alone or EcN lysate +/- 0.1 ug/ml PIGF for 48hr. CD8<sup>+</sup> T cell populations were stained for CD45RO and CD62L expression to determine effector T cell differentiation, from stem cell memory ( $T_{scm}$ ) CD62L<sup>+</sup>CD45RO<sup>-</sup>, central memory ( $T_{cm}$ ) CD62L<sup>+</sup>CD45RO<sup>+</sup>, effector memory ( $T_{em}$ ) CD62L<sup>-</sup>CD45RO<sup>+</sup>, and terminal effector ( $T_{eff}$ ) CD62L<sup>-</sup>CD45RO<sup>-</sup>.

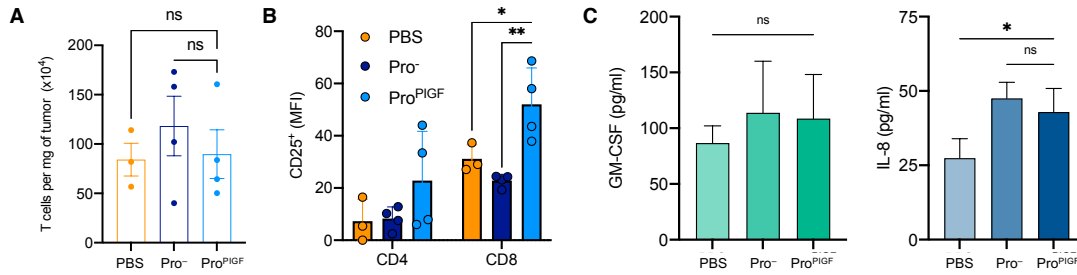

**Supplementary Figure 8. Characterizing the effect of EcN strains on GFP28z cells *in vivo*.**

Nalm6 cells ( $5 \times 10^5$ ) were implanted subcutaneously into the hind flank of NSG mice. When tumor volumes reached  $\sim 100 \text{mm}^3$ , mice were I.T. injected with either PBS or  $1 \times 10^5$  CFU of Pro<sup>PIGF</sup> or Pro<sup>-</sup>. On day 2 post Pro<sup>X</sup> injection, all groups received an I.T. injection of  $2.5 \times 10^6$  GFP28z ProCAR-T cells. Tumors were harvested and homogenized on day 4 for analysis. **(A)** Absolute counts of hCD45<sup>+</sup>CD3<sup>+</sup> cells per mg of tumor. **(B)** Flow cytometric quantification of CD25 surface expression on intratumoral hCD45<sup>+</sup>CD3<sup>+</sup> CD8<sup>+</sup> or CD4<sup>+</sup> cells from each treatment group. **(C)** Quantification of cytokine levels from tumor homogenates. Error bars represent s.d. of biological replicates, \* p < 0.05, \*\* p < 0.01 1way (A) or 2way ANOVA (B), Holm-Sidak multiple comparison correction.



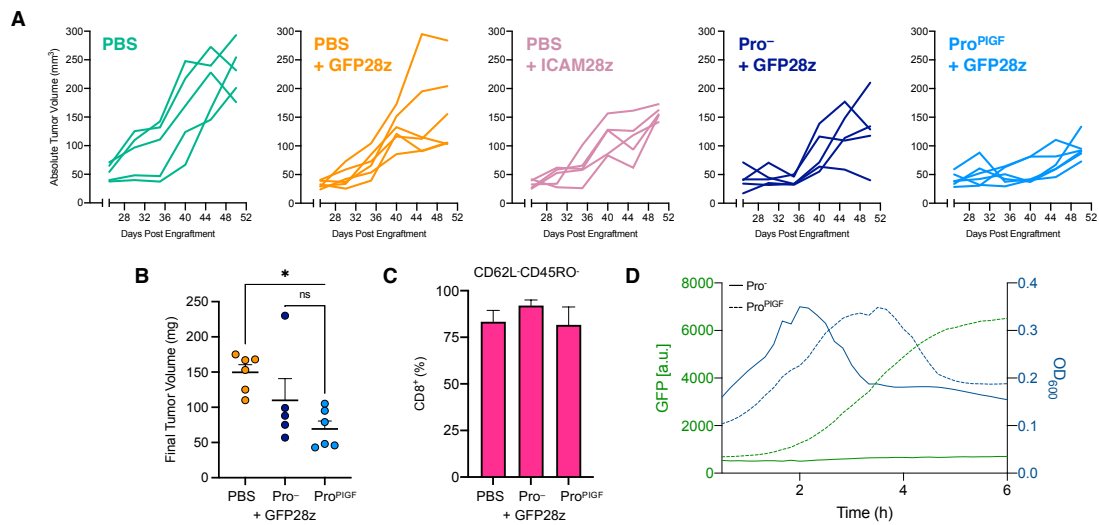

**Supplementary Figure 9. Characterization of T cell exhaustion in a triple negative breast cancer (TNBC) model.** (A) Subcutaneous MDA-MB-468 tumors were established in NSG mice prior to I.T. injection with PBS, Pro<sup>-</sup>, or Pro<sup>PIGF</sup> on day 26 post tumor engraftment. On day 28, mice received a single I.T. injection of either PBS, 2.5x10<sup>6</sup> GFP28z ProCAR-T cells, or 2.5x10<sup>6</sup> ICAM1-specific CAR-T cells (1CAM28z), as in Fig. 5A. Tumor growth was monitored by caliper measurements every 3-4 days, individual tumor trajectories are shown. (B) On day 55 tumors were taken from mice treated with PBS, Pro<sup>-</sup>, or Pro<sup>PIGF</sup> strains in combination with GFP28z and weighed *ex vivo*. (C) Frequency of intratumoral hCD45<sup>+</sup>CD3<sup>+</sup>CD8<sup>+</sup> cells displaying a terminally differentiated effector phenotype (T<sub>eff</sub>, CD62L<sup>-</sup>CD45RO<sup>-</sup>). (D) Pro<sup>X</sup> strains were isolated from day 55 tumor homogenates and grown overnight on the plate reader to measure OD<sub>600</sub> and GFP fluorescence intensity. Error bars represent s.d. of biological replicates, \* p<0.05 1way ANOVA; ns, not significant

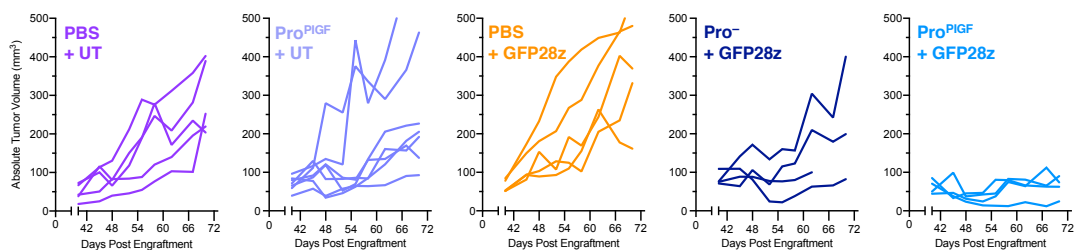

**Supplementary Figure 10. Individual growth trajectories of MDA-MB-468 subcutaneous TNBC tumors treated with the ProCAR system.** Subcutaneous MDA-MB-468 tumors were established in NSG mice prior to I.T. injection with PBS, Pro<sup>-</sup>, or Pro<sup>PIGF</sup> on day 40 post tumor engraftment. On day 44 Mice received an initial I.T. injection of  $2.5 \times 10^6$  untransduced (UT), or  $2.5 \times 10^6$  GFP28z ProCAR-T cells, followed by a second I.T. dose of UT or ProCAR-T cells 14 days later (day 58), as in Fig. 5F. Tumor growth was monitored by caliper measurements every 3-4 days, individual tumor trajectories are shown.
